# Supplementary material
Source: publisher site journal article supplement (https://www.dovepress.com/article/372936)
Supplement: Supplementary file 1 [file get_supplementary_file.php]

**Supplementary Table 1. SMI exacerbations before and after bereavement in 3-month intervals**

| **Relationship** | **Time** | **ORadj** | **Lower bound 95%CI** | **Upper bound 95%CI** |
| --- | --- | --- | --- | --- |
| **Partner** | 1-3 months | **1.43** | **1.13** | **1.81** |
|  | 3-6 months | 1.08 | 0.83 | 1.41 |
|  | 6-9 months | 1.28 | 0.99 | 1.64 |
|  | 9-12 months | 1.06 | 0.81 | 1.39 |
|  | 12-15 months | 1.06 | 0.81 | 1.38 |
|  | 15-18 months | 1.05 | 0.80 | 1.38 |
|  | 18-21 months | 1.02 | 0.77 | 1.35 |
|  | 21-24 months | 0.93 | 0.69 | 1.25 |
| **Children** | 1-3 months | 1.08 | 0.97 | 1.20 |
|  | 3-6 months | 0.93 | 0.84 | 1.04 |
|  | 6-9 months | 0.92 | 0.82 | 1.03 |
|  | 9-12 months | 0.93 | 0.83 | 1.04 |
|  | 12-15 months | **0.85** | **0.76** | **0.96** |
|  | 15-18 months | **0.86** | **0.76** | **0.97** |
|  | 18-21 months | **0.83** | **0.73** | **0.94** |
|  | 21-24 months | **0.87** | **0.77** | **0.99** |

**Notes:**

Any SMI exacerbation includes hospitalization in psychiatric hospital or attempted or completed suicide in three-month intervals. The reference period is 9-12 months before bereavement (271-360 days before death).

Models adjusted for sex, age (categorical), educational level, CCI and region.

The model for adult children also adjusts for whether there are other living siblings.

Partner: *p*-value of time-effect (*df*=8), 0.04. Children: *p*-value for time-effect (*df*=8), 0.0003.

Bold values indicate statistical significance.
